# Supplementary material for: Solvothermal synthesis, crystal structures and properties of three new thiogermanates: the only example of the thiogermanate anion [Ge2S6]4− as a bridging ligand to a lanthanide complex ion
Source: Royal Society of Chemistry journal article supplement (doi:10.1039/c2ce25082a), 2012-01-01
Supplement: c2ce25082a.pdf [file c2ce25082a.pdf]

**Solvothermal synthesis, crystal structures and properties of three new  
thiogermanates: The only example of the thiogermanate anion  $[\text{Ge}_2\text{S}_6]^{4-}$  as a  
bridging ligand to a lanthanide complex ion**

Xing Liu, Feilong Hu, Jian Zhou, Litao An, Dawen Liang and Jianwu Lin

Table S1. Selected Bond Lengths (Å) and Angles (deg) for **1-3**.

| <b>1</b>    |            |             |            |
|-------------|------------|-------------|------------|
| Ge1-S3      | 2.1477(13) | Ge1-S2#1    | 2.2678(10) |
| Ge1-S1      | 2.1638(11) | Ge1-S2      | 2.2796(11) |
| S3-Ge1-S1   | 115.69(4)  | S3-Ge1-S2   | 111.30(4)  |
| S3-Ge1-S2#1 | 112.54(5)  | S1-Ge1-S2   | 110.33(5)  |
| S1-Ge1-S2#1 | 110.38(4)  | S2#1-Ge1-S2 | 94.67(4)   |
| <b>2</b>    |            |             |            |
| Eu1-N8      | 2.601(3)   | Eu1-N5      | 2.623(3)   |
| Eu1-N4      | 2.601(3)   | Eu1-N6      | 2.623(3)   |
| Eu1-N1      | 2.612(3)   | Eu1-N3      | 2.623(3)   |
| Eu1-N9      | 2.618(3)   | Eu1-N2      | 2.633(3)   |
| Eu1-N7      | 2.669(3)   | Ge1-S3      | 2.2740(11) |
| Ge1-S1      | 2.1595(11) | Ge1-S3#2    | 2.2884(11) |
| Ge1-S2      | 2.1604(11) | N4-Eu1-N9   | 147.34(11) |
| N8-Eu1-N4   | 136.00(10) | N1-Eu1-N9   | 76.72(11)  |
| N8-Eu1-N1   | 136.60(10) | N8-Eu1-N5   | 116.20(10) |
| N4-Eu1-N1   | 87.40(11)  | N4-Eu1-N5   | 65.71(11)  |
| N8-Eu1-N9   | 65.12(11)  | N1-Eu1-N5   | 77.06(10)  |
| N9-Eu1-N5   | 135.00(10) | N4-Eu1-N3   | 77.22(11)  |
| N8-Eu1-N6   | 73.47(9)   | N1-Eu1-N3   | 127.19(10) |
| N4-Eu1-N6   | 130.32(10) | N9-Eu1-N3   | 89.82(10)  |
| N1-Eu1-N6   | 76.84(10)  | N5-Eu1-N3   | 135.02(10) |
| N9-Eu1-N6   | 73.88(10)  | N6-Eu1-N3   | 147.62(10) |
| N5-Eu1-N6   | 64.92(10)  | N8-Eu1-N2   | 119.36(11) |
| N8-Eu1-N3   | 74.31(10)  | N4-Eu1-N2   | 75.08(12)  |
| N4-Eu1-N7   | 75.10(11)  | N1-Eu1-N2   | 62.98(11)  |
| N1-Eu1-N7   | 149.80(10) | N9-Eu1-N2   | 72.28(12)  |
| N9-Eu1-N7   | 129.94(11) | N5-Eu1-N2   | 124.44(11) |
| N5-Eu1-N7   | 73.36(10)  | N6-Eu1-N2   | 131.98(11) |
| N6-Eu1-N7   | 95.77(10)  | N3-Eu1-N2   | 64.27(11)  |
| N3-Eu1-N7   | 73.21(10)  | N8-Eu1-N7   | 64.99(11)  |
| N2-Eu1-N7   | 132.15(10) | S1-Ge1-S2   | 111.66(5)  |
| S1-Ge1-S3#2 | 113.30(5)  | S1-Ge1-S3   | 115.14(5)  |
| S2-Ge1-S3#2 | 111.75(5)  | S2-Ge1-S3   | 111.12(5)  |
| S3-Ge1-S3#2 | 92.57(4)   |             |            |
| <b>3</b>    |            |             |            |
| Y1-O1       | 2.248(8)   | Y1-S3       | 2.870(3)   |

|             |            |            |            |
|-------------|------------|------------|------------|
| Y1-O1#3     | 2.297(6)   | Y1-Y1#3    | 3.706(2)   |
| Y1-N5       | 2.544(10)  | Ge1-S1     | 2.173(3)   |
| Y1-N3       | 2.564(9)   | Ge1-S3     | 2.191(3)   |
| Y1-N1       | 2.553(9)   | Ge1-S2     | 2.273(4)   |
| Y1-N4       | 2.573(12)  | Ge1-S2#4   | 2.286(3)   |
| Y1-N2       | 2.593(9)   |            |            |
| S1-Ge1-S3   | 115.45(12) | O1-Y1-O1#3 | 70.7(3)    |
| S1-Ge1-S2   | 111.63(15) | O1-Y1-N5   | 150.3(3)   |
| S3-Ge1-S2   | 110.94(13) | O1#3-Y1-N5 | 135.1(3)   |
| S1-Ge1-S2#4 | 114.45(12) | O1-Y1-N3   | 84.4(3)    |
| S3-Ge1-S2#4 | 108.76(14) | O1#3-Y1-N3 | 79.0(3)    |
| S2-Ge1-S2#4 | 93.54(12)  | N5-Y1-N3   | 111.7(4)   |
| N3-Y1-N1    | 128.7(3)   | O1-Y1-N1   | 74.9(3)    |
| O1-Y1-N4    | 142.8(3)   | O1#3-Y1-N1 | 132.8(3)   |
| O1#3-Y1-N4  | 79.1(3)    | N5-Y1-N1   | 75.6(4)    |
| N5-Y1-N4    | 66.5(4)    | N5-Y1-N2   | 75.3(4)    |
| N3-Y1-N4    | 68.6(4)    | N3-Y1-N2   | 66.0(3)    |
| N1-Y1-N4    | 142.1(4)   | N1-Y1-N2   | 67.5(3)    |
| O1-Y1-N2    | 90.1(3)    | N4-Y1-N2   | 101.1(4)   |
| O1#3-Y1-N2  | 141.7(3)   | O1-Y1-S3   | 100.64(17) |
| N4-Y1-S3    | 94.8(3)    | O1#3-Y1-S3 | 79.96(17)  |
| N2-Y1-S3    | 137.3(2)   | N5-Y1-S3   | 75.3(2)    |
| N1-Y1-S3    | 75.6(2)    | N3-Y1-S3   | 155.4(2)   |

Symmetry transformations used to generate equivalent atoms: (#1)  $-x+1, -y+1, -z+1$ ; (#2)  $-x+1, -y, -z+1$ ; (#3)  $-x+1/2, -y+3/2, -z+1$ ; (#4)  $-x, -y+2, -z+1$ .

Table S2. Hydrogen bonds for **1** [Å and deg].

| D-H...A       | d(D-H)    | d(H...A) | d(D...A) | <(DHA) |
|---------------|-----------|----------|----------|--------|
| N4-H4C...S1#1 | 0.89(5)   | 2.49(5)  | 3.361(4) | 169(4) |
| N4-H4B...S1#2 | 0.87(5)   | 2.48(5)  | 3.311(4) | 160(4) |
| N2-H2G...S3#3 | 0.889(19) | 2.71(3)  | 3.467(4) | 143(4) |
| N2-H2G...S1#3 | 0.889(19) | 2.85(4)  | 3.502(3) | 131(4) |
| N4-H4A...S3#4 | 0.90(5)   | 2.46(5)  | 3.352(4) | 179(4) |
| N2-H2F...S1#2 | 0.90(2)   | 2.56(2)  | 3.434(4) | 165(4) |
| N2-H2E...N1#5 | 0.911(19) | 2.06(3)  | 2.902(5) | 153(5) |

Symmetry transformations used to generate equivalent atoms: (#1)  $-x+3/2, y+1/2, -z+3/2$ ; (#2)  $x+1/2, -y+1/2, z+1/2$ ; (#3)  $-x+3/2, -y+1/2, -z+1$ ; (#4)  $-x+3/2, y-1/2, -z+3/2$ ; (#5)  $x, y-1, z$ .

Table S3. Hydrogen bonds for **2** [Å and deg].

| D-H...A        | d(D-H) | d(H...A) | d(D...A) | <(DHA) |
|----------------|--------|----------|----------|--------|
| N1-H1A...S3#2  | 0.90   | 2.94     | 3.696(4) | 143    |
| N1-H1B...C11#2 | 0.90   | 2.69     | 3.422(4) | 140    |
| N2-H2C...S1#3  | 0.91   | 2.66     | 3.530(4) | 160    |
| N3-H3A...S2#1  | 0.90   | 2.57     | 3.472(4) | 175    |
| N4-H4A...S2#1  | 0.90   | 2.50     | 3.402(4) | 175    |
| N4-H4B...C11#4 | 0.90   | 2.60     | 3.398(4) | 148    |
| N5-H5C...S1#5  | 0.91   | 2.66     | 3.453(3) | 146    |
| N6-H6A...S2#2  | 0.90   | 2.51     | 3.358(3) | 158    |
| N6-H6B...C11#5 | 0.90   | 2.54     | 3.427(3) | 170    |
| N7-H7A...S2#1  | 0.90   | 2.95     | 3.783(4) | 155    |
| N8-H8C...C11#5 | 0.91   | 2.42     | 3.285(3) | 160    |
| N9-H9A...S2#2  | 0.90   | 2.53     | 3.386(4) | 160    |
| N9-H9B...S1#3  | 0.90   | 2.61     | 3.476(3) | 163    |

Symmetry transformations used to generate equivalent atoms: (#1)  $-x+1, -y, -z+1$ ; (#2)  $-x+3/2, y+1/2, -z+3/2$ ; (#3)  $x+1/2, -y+1/2, z+1/2$ ; (#4)  $x+1/2, -y+1/2, z-1/2$ ; (#5)  $x+1, y, z$ .

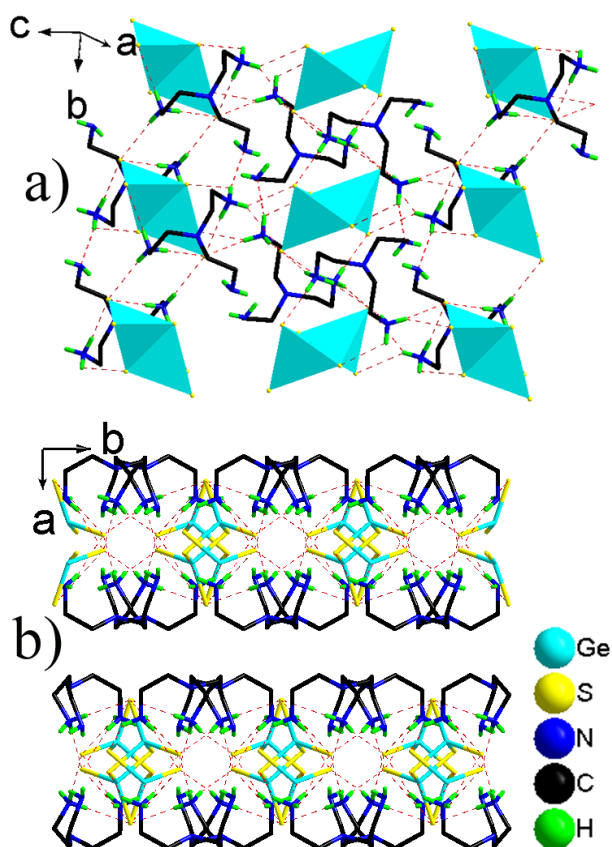

Figure S1 (a) Part of the crystal structure of **1**, showing the formation of a layer constructed from N-H...S hydrogen bonds. (b) View of the stacking mode for the layers in **1**. H atoms bonded to C atoms have been omitted for clarity.

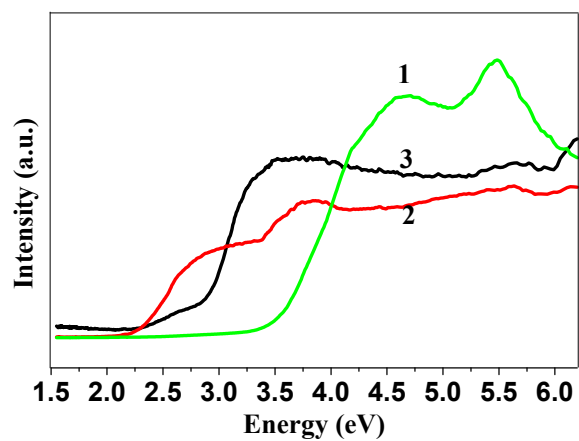

Figure S2 Solid-state optical absorption spectra of 1-3.

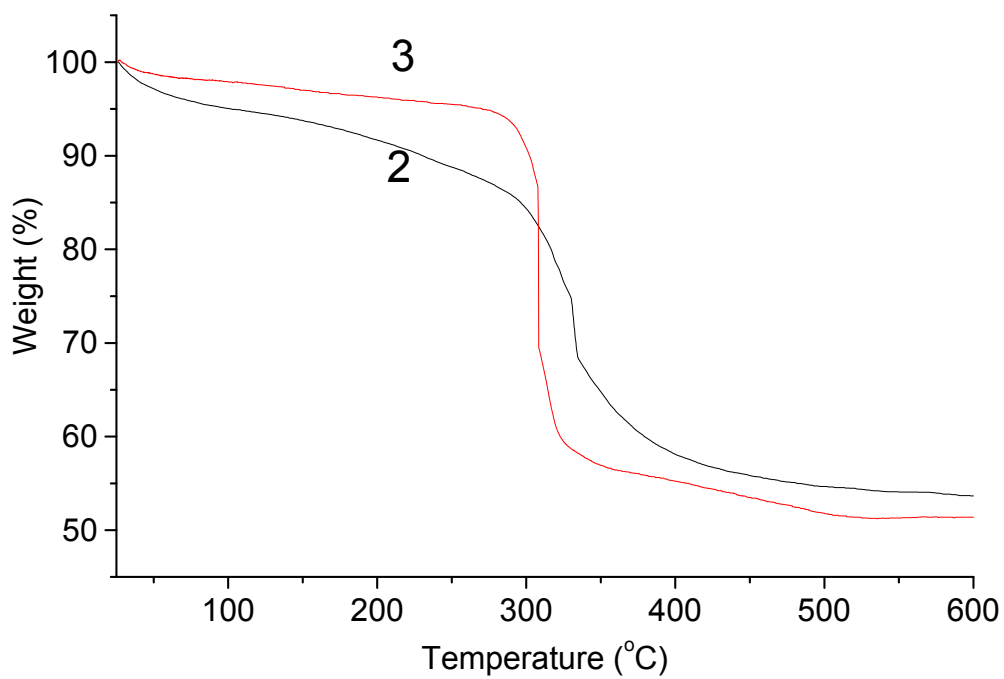

Figure S3 TG curves of 2 and 3.
